# Supplementary material for: Optimizing Public Charging: An Integrated Approach Based on GIS and Multi-Criteria Decision Analysis
Source: MDPI journal article supplement (doi:10.3390/wevj13080131), 2022-07-25
Supplement: s1 [file s1]

## Questionnaire

Dear X,

Thank you for taking part in this questionnaire for a research in collaboration with IKEM, entitled by ***“Optimizing Public EV Charging for Municipalities: An integrated approach based on geospatial and multi-criteria decision-making analysis”***. This study is being done by Ali Khalife in completion for the degree of MBA in Sustainable Mobility Management at the Technische Universität Berlin.

The purpose of this study is to support an effective development of public EV charging on a municipal level through projecting the future demand size and distribution. As shown in figure 1, a set of criteria are being selected and spatially analyzed to evaluate the potential locations for public charging stations.

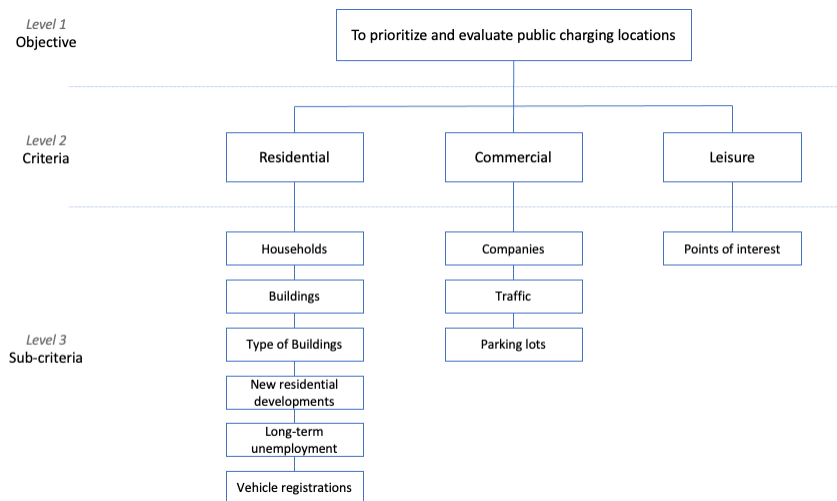

Figure 1 Evaluation Criteria

The questionnaire aims to incorporate the municipality’s mobility strategy to facilitate public charging between different demand dimensions (level 2), and its assessment of the significance of each sub-criterion (level 3) on public charging demand. The results of this study will be used for scholarly purposes only, and no personal data will be disclosed.

In case you have any questions about the research study, please feel free to contact me on [ali.khalife@campus.tu-berlin.de](mailto:ali.khalife@campus.tu-berlin.de).

Sincerely,

Ali Khalife

## Glossary

|                                  |                                                                                                                    |
|----------------------------------|--------------------------------------------------------------------------------------------------------------------|
| <b>Household</b>                 | number of households within a specific area                                                                        |
| <b>Buildings</b>                 | number of buildings within a specific area                                                                         |
| <b>New residential buildings</b> | number of new units within a specific area                                                                         |
| <b>Type of buildings</b>         | ex. house, apartment building, represented by the average number of floors of the buildings within a specific area |
| <b>Long-term unemployment</b>    | long-term unemployment rates within a specific area                                                                |
| <b>Vehicle Registrations</b>     | number of registered vehicles within a specific area                                                               |
| <b>Companies</b>                 | number of companies within a specific area                                                                         |
| <b>Traffic</b>                   | volume of traffic within a specific area                                                                           |
| <b>Parking lots</b>              | availability of parking lots within a specific area                                                                |
| <b>Points of interest</b>        | number of key attractions and landmarks within a specific area                                                     |

Please indicate (x) the relative importance of **criterion A** (left column) to **criterion B** (right column) in each row.

- Residential and Commercial are **“Equally”** important
- Leisure is **“Strongly”** important compared to Residential
- Commercial is **“Moderately”** important compared to Leisure

[illegible]

## Level 2 – Criteria: Demand Dimension

[illegible]

### Level 3 – Sub-criteria: Commercial

[illegible]

Level 3 – Sub-criteria: Residential

[illegible]
