# Supplementary material for: Optimizing Public Charging: An Integrated Approach Based on GIS and Multi-Criteria Decision Analysis
Source: MDPI journal article supplement (doi:10.3390/wevj13080131), 2022-07-25
Supplement: s1 [file s1]

## Scoring Scheme

| Criteria                           | min  | max   | Range | Class Intervals | Grade |
|------------------------------------|------|-------|-------|-----------------|-------|
| <b>Household</b>                   | 4    | 3724  | 3720  | 0               | 0     |
|                                    |      |       |       | 1 744           | 1     |
|                                    |      |       |       | 745 1489        | 2     |
|                                    |      |       |       | 1490 2234       | 3     |
|                                    |      |       |       | 2235 2979       | 4     |
|                                    |      |       |       | 2980 3724       | 5     |
| <b>Residential Buildings</b>       | 0    | 38    | 38    | 0               | 0     |
|                                    |      |       |       | 1 8             | 1     |
|                                    |      |       |       | 9 17            | 2     |
|                                    |      |       |       | 18 26           | 3     |
|                                    |      |       |       | 27 35           | 4     |
|                                    |      |       |       | 36 44           | 5     |
| <b>Number of Floors</b>            | 0    | 8     | 8     | 0               | 0     |
|                                    |      |       |       | 1 2             | 1     |
|                                    |      |       |       | 3 5             | 3     |
|                                    |      |       |       | 6 8             | 5     |
| <b>New Residential Development</b> | 0    | 370   | 370   | 0               | 0     |
|                                    |      |       |       | 1 74            | 1     |
|                                    |      |       |       | 75 149          | 2     |
|                                    |      |       |       | 150 224         | 3     |
|                                    |      |       |       | 225 299         | 4     |
| <b>Long-term Unemployment</b>      | 0,6% | 14,7% | 14,1% | 300 374         | 5     |
|                                    |      |       |       | 0 2             | 5     |
|                                    |      |       |       | 3 5             | 4     |
|                                    |      |       |       | 6 8             | 3     |
|                                    |      |       |       | 9 11            | 2     |
|                                    |      |       |       | 12 15           | 1     |
|                                    |      |       |       | >15             | 0     |

| <i>(Continued)</i>          | Criteria | min | max  | Range | Class Intervals | Grade |
|-----------------------------|----------|-----|------|-------|-----------------|-------|
| <b>Vehicle Registration</b> |          | 0   | 6392 | 6392  | 0               | 0     |
|                             |          |     |      |       | 1 1279          | 1     |
|                             |          |     |      |       | 1280 2559       | 2     |
|                             |          |     |      |       | 2560 3839       | 3     |
|                             |          |     |      |       | 3840 5119       | 4     |
|                             |          |     |      |       | 5120 6399       | 5     |
| <b>Companies</b>            |          | 0   | 36   | 36    | 0               | 0     |
|                             |          |     |      |       | 1 8             | 1     |
|                             |          |     |      |       | 9 17            | 2     |
|                             |          |     |      |       | 18 26           | 3     |
|                             |          |     |      |       | 27 35           | 4     |
|                             |          |     |      |       | 36 44           | 5     |
| <b>Traffic</b>              |          |     |      |       | Null            | 0     |
|                             |          |     |      |       | Low             | 1     |
|                             |          |     |      |       | Low/Medium      | 2     |
|                             |          |     |      |       | Medium          | 3     |
|                             |          |     |      |       | Medium/High     | 4     |
|                             |          |     |      |       | High            | 5     |
| <b>Parking Lots</b>         |          |     |      |       | Not available   | 0     |
|                             |          |     |      |       | Available       | 5     |
| <b>POI</b>                  |          |     |      |       | Not available   | 0     |
|                             |          |     |      |       | Available       | 5     |
